# Supplementary material for: Molecular jackhammers eradicate cancer cells by vibronic-driven action
Source: Springer Nature journal article supplement (doi:10.1038/s41557-023-01383-y), 2023-12-19
Supplement: 41557_2023_1383_MOESM1_ESM.pdf [file 41557_2023_1383_MOESM1_ESM.pdf]

# Molecular jackhammers eradicate cancer cells by vibronic-driven action

---

In the format provided by the authors and unedited

## Supplementary Information

### Table of Contents

|                                                                        |   |
|------------------------------------------------------------------------|---|
| Supplementary Fig. 1.....                                              | 2 |
| Supplementary Fig. 2.....                                              | 3 |
| Supplementary Fig. 3.....                                              | 4 |
| Supplementary Fig. 4.....                                              | 5 |
| Supplementary discussion: <b>Vibronic mode activation in ICG</b> ..... | 6 |
| Supplementary discussion: <b>Flow cytometry gating strategy</b> .....  | 7 |
| Supplementary Fig. 5.....                                              | 7 |
| Supplementary Fig. 6.....                                              | 8 |

### List of supplementary figures

| Supplementary Figure | Figure title                                                                                                                            | Page |
|----------------------|-----------------------------------------------------------------------------------------------------------------------------------------|------|
| 1                    | <b>Molecular plasmon-phonon coupling in a Jablonski diagram.</b>                                                                        | 2    |
| 2                    | <b>Vibration vectors of the four main vibronic states projected into the Cy7.5 structure.</b>                                           | 3    |
| 3                    | <b>Flow cytometry analysis of Cy7.5-amine activity inhibition for permeabilization of cells using Cy5-amine as competitor molecule.</b> | 4    |
| 4                    | <b>Effect of indocyanine green (ICG) activated by 730 nm light on A375 melanoma cells.</b>                                              | 5    |
| 5                    | <b>Flow cytometry data processing and gating strategy.</b>                                                                              | 7    |
| 6                    | <b>Temperature of the cell suspension while under light treatment at 300 mW cm<sup>-2</sup> using Cy7.5-amine.</b>                      | 8    |

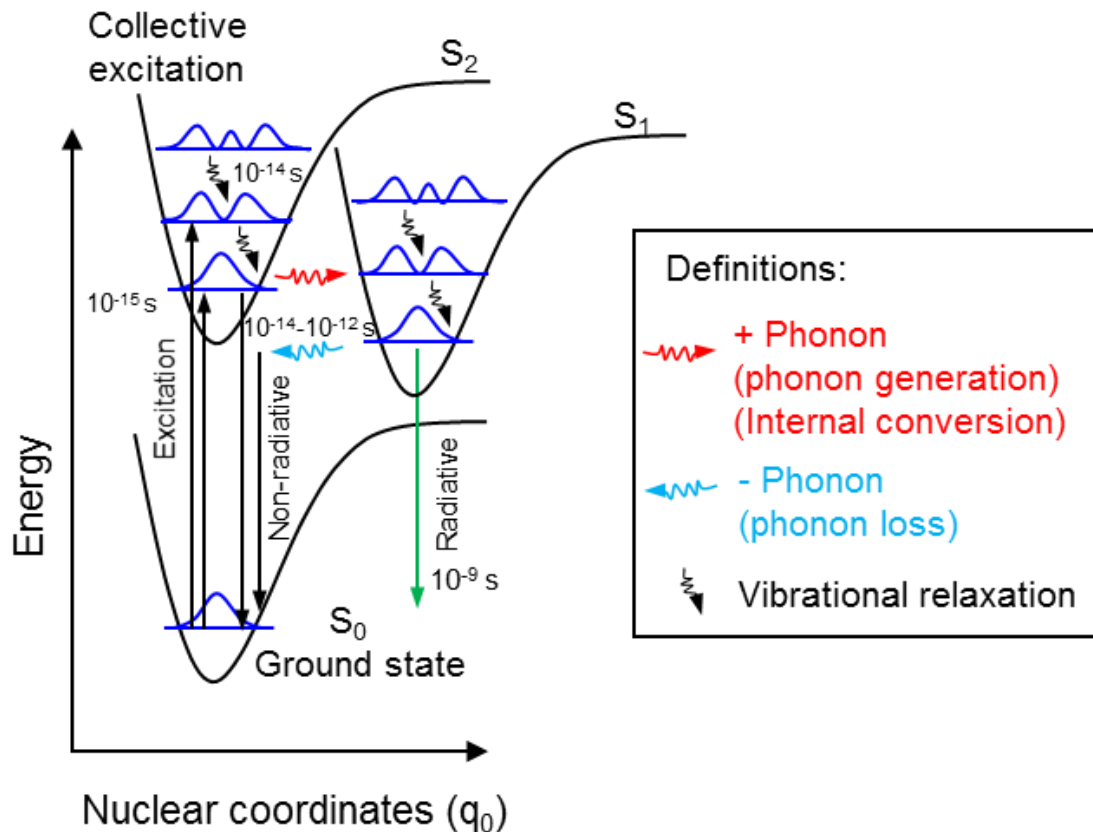

**Fig. 1 | Molecular plasmon-phonon coupling in a Jablonski diagram.** Approximate lifetimes are given for the processes involved. Phonon is the same as the vibration of the nuclei. The initial phonon generation, vibrational relaxations and internal conversion processes can happen at similar lifetimes, as short as  $10^{-14}$  s (tens of fs) especially in suitable molecular structures that support molecular plasmons. Longer vibrational relaxations involved in the vibrational decay (vibrational cooling of the system), which are driven by electron-phonon damping processes, can take longer up to few ps in the decay lifetime (phonon loss) of the vibronic oscillations. Each of these oscillations can be tens of fs and decay coherently overtime.

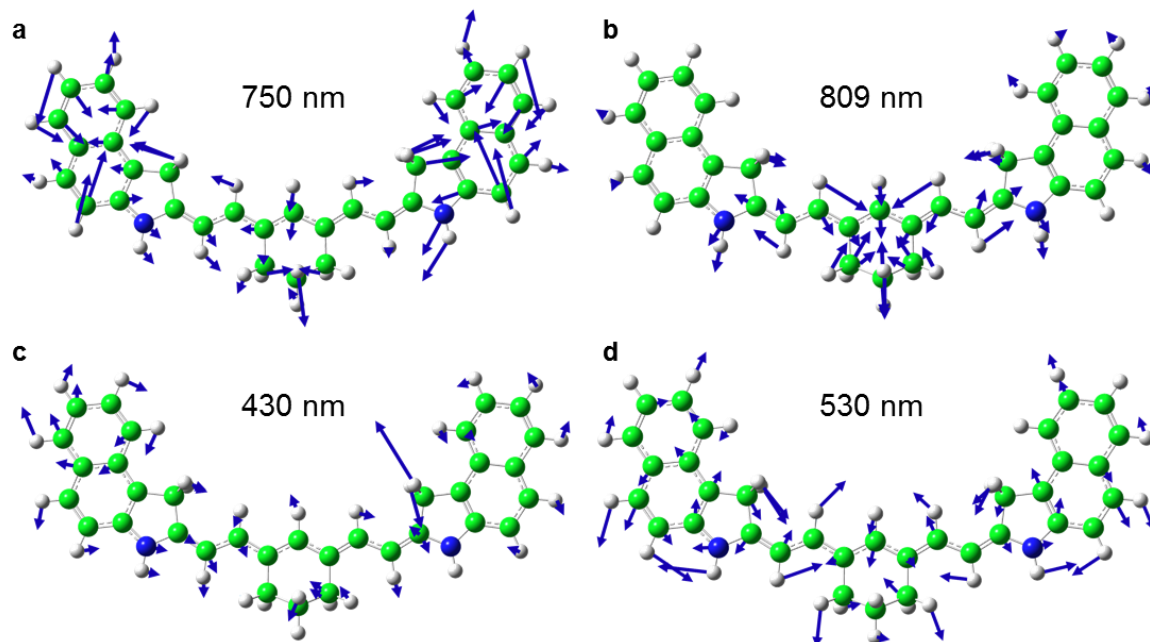

**Fig. 2 | Vibration vectors of the four main vibronic states projected into the Cy7.5 structure.**

The vibration vectors were obtained from TD-DFT calculations. **a)** The experimental 730 nm absorption band, here assigned as 750 nm from theory, is a vibration throughout the length of (longitudinal vibration across the polyene bridge) and width of the molecule (transversal vibration across the benzoindole). **b)** The experimental 780 nm absorption band, here assigned as 809 nm from theory, is dominantly a longitudinal vibration across the polyene bridge. **c)** The experimental 400 nm absorption band, here assigned as 430 nm from theory, is predominantly a transversal vibration of the molecule. **d)** The experimental 450 nm absorption band, here assigned as 530 nm from theory, is mainly a longitudinal vibration of the molecule across the polyene bridge. The TD-DFT calculations described more accurately the longer wavelengths (780 nm and 730 nm) of the absorption bands in the spectrum than the short wavelength absorptions (Extended Data Fig. 1).

**Cell binding competition of Cy5-amine against Cy7.5-amine.** The permeabilization activity of Cy7.5-amine in A375 cells was partially inhibited by the addition of Cy5-amine as shown in Supplementary Fig. 3. In this test, Cy7.5-amine at 1  $\mu\text{M}$  was used in the presence of 8  $\mu\text{M}$  Cy5-amine.

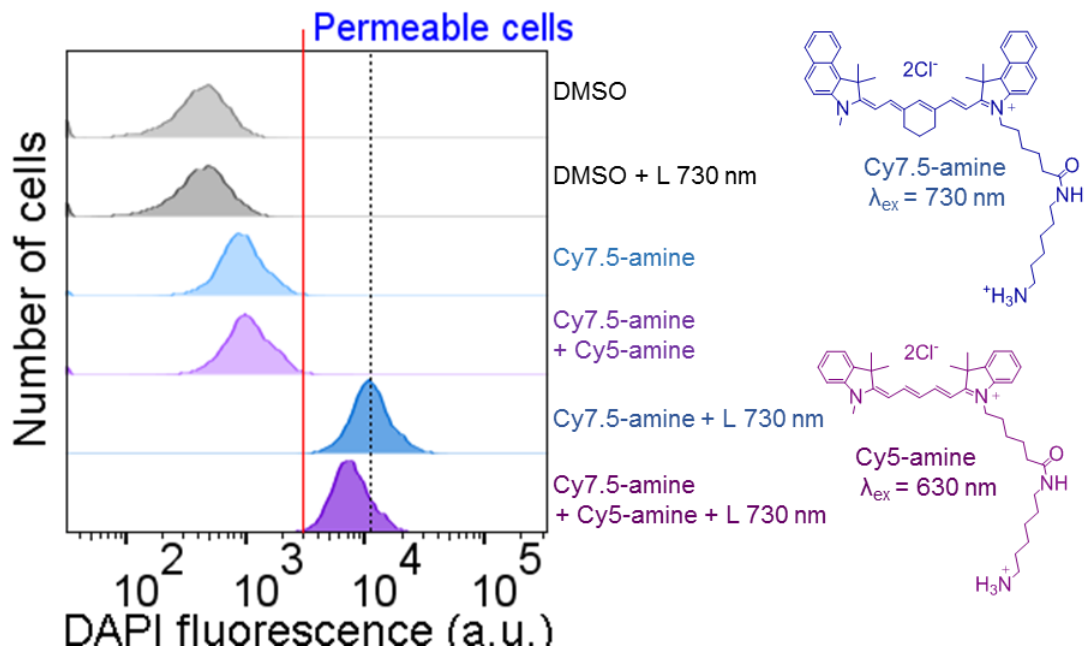

**Fig. 3 | Flow cytometry analysis of Cy7.5-amine activity inhibition for permeabilization of cells using Cy5-amine as competitor molecule.** Cy5-amine interacts with the cells and competes with Cy7.5-amine. The 730 nm LED excites Cy7.5-amine but does not excites Cy5-amine (the excitation of Cy5-amine using 730 nm LED is almost negligible). The concentration of Cy7.5-amine was 1  $\mu\text{M}$  and Cy5-amine was 8  $\mu\text{M}$ . The illumination was done with 730 nm LED, 80  $\text{mW cm}^{-2}$  for 10 min. The red line is to indicate the gate level for DAPI positive cells. The black dotted line is to guide the shifting position of the peak in presence of Cy5-amine. Three independent flow cytometry experiments were conducted ( $n = 3$ ), a presentative is presented. Detailed flow cytometry data processing is described in Supplementary Information Fig. 5.

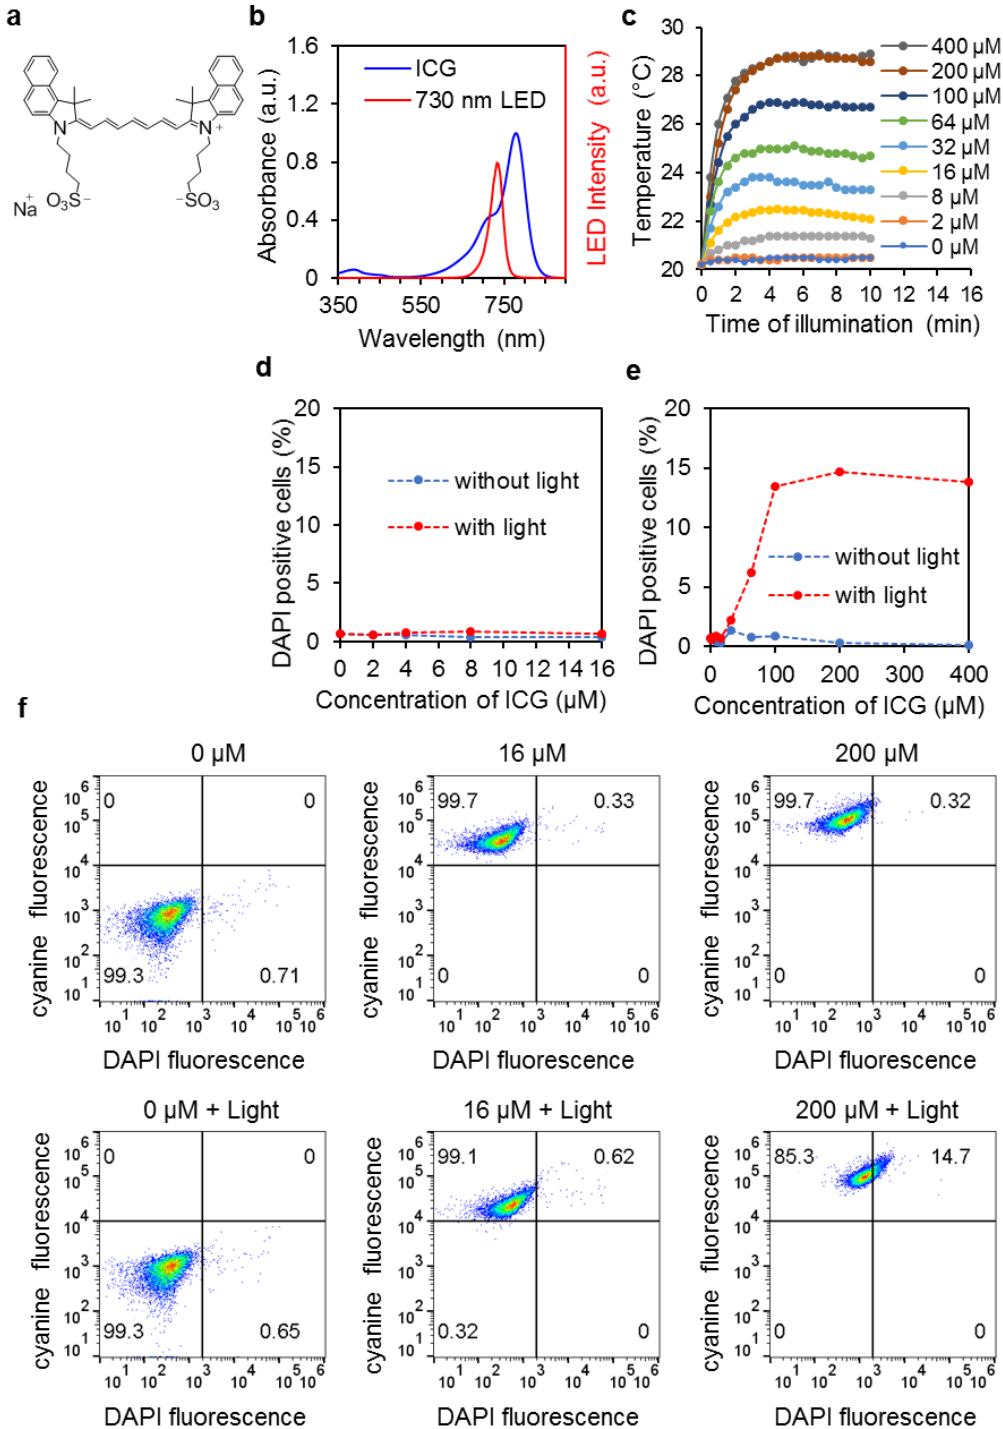

**Fig. 4 | Effect of indocyanine green (ICG) activated by 730 nm light on A375 melanoma cells.** (a) Structure of ICG. (b) Absorption spectrum of ICG in water with 0.1% DMSO. The LED spectrum is also shown. (c) Photothermal heating effect of ICG at various concentrations and illuminated by 730 nm light at 80  $\text{mW cm}^{-2}$  over time from 0 to 10 min. (d) Percentage of

permeabilized cells (DAPI positive cells) in the range of ICG concentration from 0 to 16  $\mu\text{M}$ . Cells were illuminated with 730 nm light at 80  $\text{mW cm}^{-2}$  for 10 min. (e) Percentage of permeabilized cells (DAPI positive cells) in the range of ICG concentration from 0 to 400  $\mu\text{M}$ . Cells were illuminated with 730 nm light at 80  $\text{mW cm}^{-2}$  for 10 min. (f) Representative flow cytometry plots showing the DAPI positive gates from where **d** and **e** were constructed. The numbers inside the gates (four quadrants) in the flow cytometry plot represent the percentage of cells in each gate: ICG and DAPI negative (left bottom), ICG positive and DAPI negative (left top), ICG negative and DAPI positive (right bottom), and ICG positive and DAPI positive (top right). 10,000 cells are analyzed in each concentration. One sample is treated and analyzed for each concentration. Detailed flow cytometry data processing is described in Supplementary Information Fig. 5.

### **Vibronic mode activation in ICG and effect on permeabilizing cancer cells.**

Another cyanine was also tried that has a vibronic absorption shoulder at 730 nm, indocyanine green (ICG), bearing alkylsulfonate addends, as shown in Supplementary Fig. 4 a-b. The sulfonates will not interact with phospholipids in lipid bilayers. ICG is commonly used, and it is FDA-approved for intravenous injection. However, ICG was not able to permeabilize the cells under the same conditions in which Cy7.5-amine was tested, 2  $\mu\text{M}$  and illumination for 10 min of 730 nm light at 80  $\text{mW cm}^{-2}$  (Supplementary Fig. 4). The presence of 1% or less of DAPI positive cells is considered normal content of cell death in every cell batch and this is baseline in the control. Furthermore, ICG does not cause a photothermal effect at 2  $\mu\text{M}$  since the temperature of the media remains at the baseline at 20  $^{\circ}\text{C}$  (Supplementary Fig. 4 c). The photothermal effects of ICG were studied at the high concentration range of 8  $\mu\text{M}$  up to 400  $\mu\text{M}$  (Supplementary Fig. 4 c). Below 32  $\mu\text{M}$ , from 0 to 16  $\mu\text{M}$ , there was no observed cell permeabilization to DAPI with or without the light treatment (Supplementary Fig. 4 d, f). In the range of 32  $\mu\text{M}$  up to 400  $\mu\text{M}$ , there was observed permeabilization of the cells to DAPI from 2% up to 14%, respectively (Supplementary Fig. 4S2 e, f). This cell permeabilization was caused by the photothermal effect since the medium showed a significant temperature increase in this range of concentrations. The permeabilization of the cells by the photothermal effect with ICG reached its maximum at 200  $\mu\text{M}$  because of the attenuation of the light by ICG; the transmittance of the light is compromised as the ICG concentration increases.

**Flow cytometry data processing and gating strategy.** The flow cytometry data was analyzed using FlowJo software version 10.5.3. The cells were plot using the forward scattering area (FSC-A) versus side scattering area (SSC-A) as shown in Supplementary Fig. 5a. Then, a wide polygonal gate was drawn as shown in Supplementary Fig. 5a since we were interested to detect any cell death after treatment, we were not only interested to measure healthy cell populations. Sometimes, we observed that some death cell population upon treatment could shift outside the gate if a narrow gate was used. Then, the singlet cells were selected by plotting the FSC-A versus the forward scattering height (FSC-H) as shown in Supplementary Fig. 5b. Then, the singlets were selected and the DAPI fluorescence intensity was plotted versus the SSC-A and the gate for DAPI positive cells was drawn as shown in Supplementary Fig. 5c and the analysis was applied to all samples in the group. In Supplementary Fig. 5d can be observed a DAPI positive population in the same analysis group. This analysis was applied to calculate the percentage of DAPI positive cells.

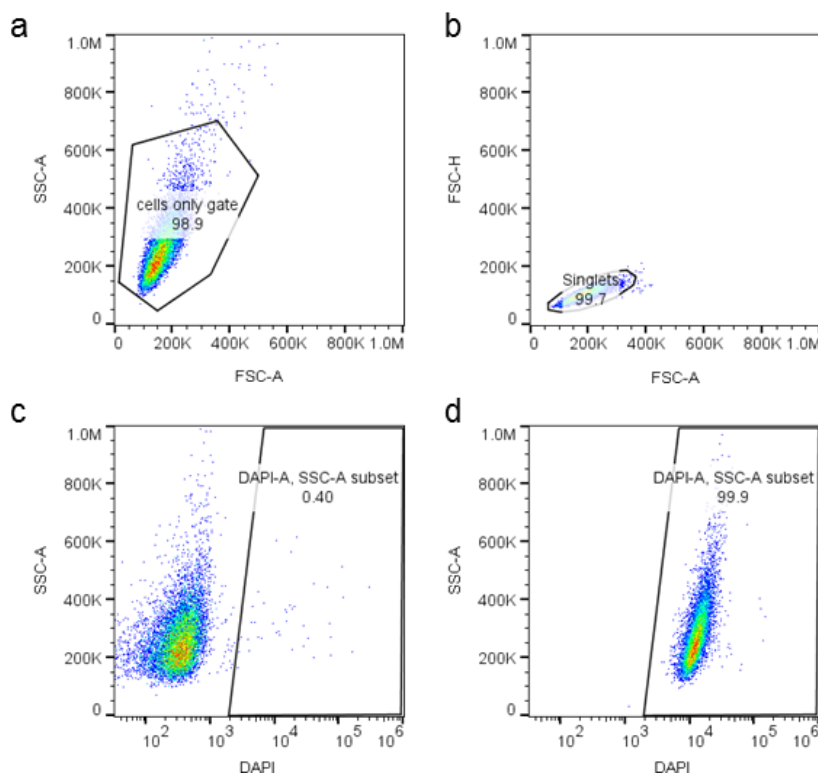

**Fig 5 | Flow cytometry data processing and gating strategy.** Data analysis was done using FlowJo version 10.5.3. a) Selection of the cell population by plotting forward scattering area (FSC-A) versus side scattering area (SSC-A). b) Selection of single cells by plotting FSC-A versus FSC-height (FSC-H). c) Gating of DAPI positive cells in a control sample containing 0.1% DMSO. d) Application of the same gate conditions as shown in c to a DAPI positive sample which was treated with Cy7.5-amine and 730 nm light. The number in the inset in each gate shows the percentage of positive cells.



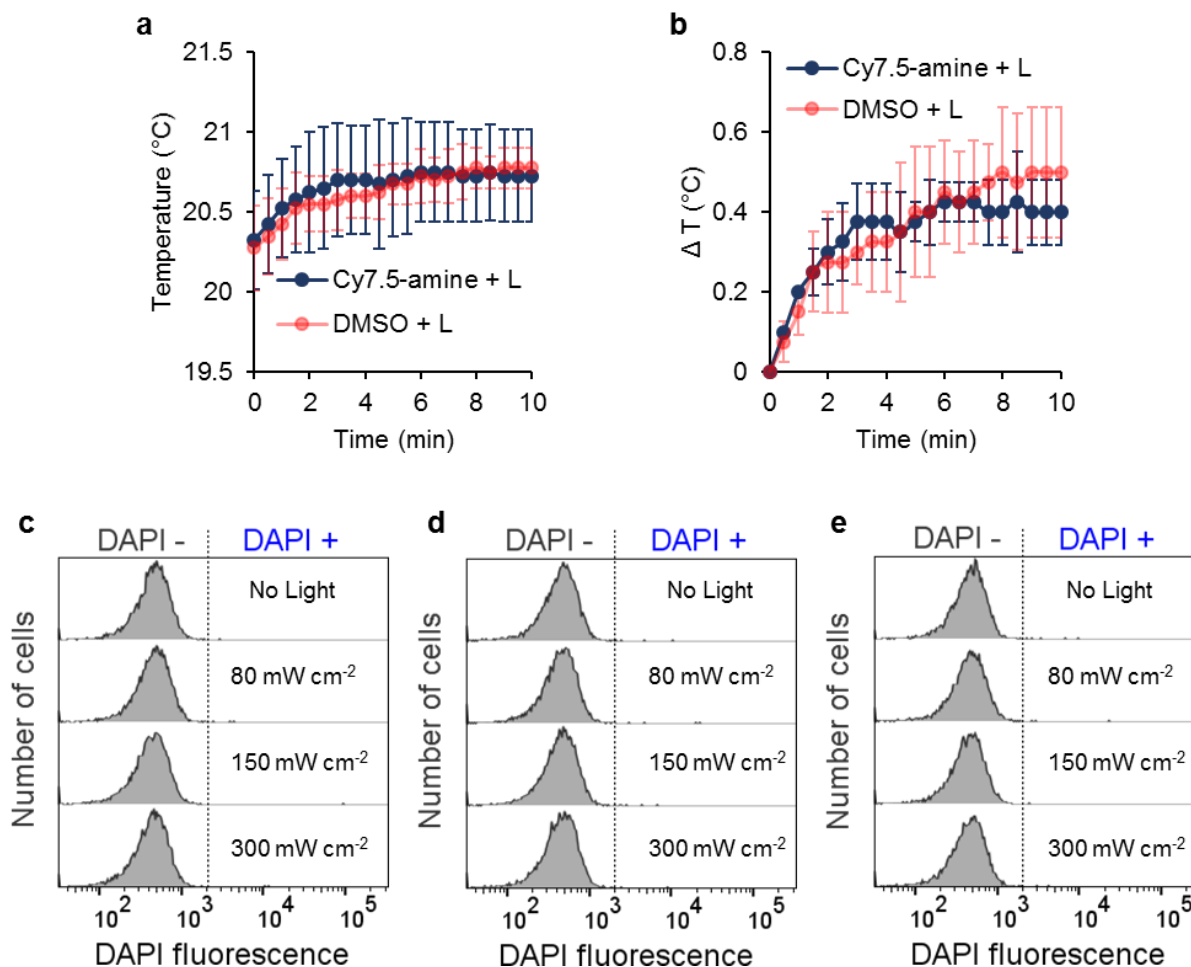

**Fig. 6 | Temperature of the cell suspension while under light treatment at 300 mW cm<sup>-2</sup> using Cy7.5-amine.** (a) Temperature of cell suspension over time. Data are presented as mean values  $\pm$  SD ( $n = 3$ ). (b) Temperature increase over time relative to initial temperature. Data are presented as mean values  $\pm$  SD ( $n = 3$ ). The treatment consisted of the cell suspension (A375 cells) with 2  $\mu$ M Cy7.5-amine and under illumination with 730 nm NIR light (300 mW cm<sup>-2</sup> for 10 min). There is no photothermal effect of Cy7.5-amine beyond the minimal heating caused by the light alone of  $\sim 0.5$  °C in the DMSO + L control. The temperature measurements were repeated  $n = 4$ . The effect of the optical power of NIR light on the viability of the cells at 80, 150, and 300 mW cm<sup>-2</sup> in (c) repetition 1, (d) repetition 2, and (e) repetition 3. The cell viability is measured by flow cytometry analysis. Concentration of DAPI and exposure time:  $C = 1$   $\mu$ M for 20 min.
